# Supplementary material for: Chronic Dicer1 deficiency promotes atrophic and neovascular outer retinal pathologies in mice
Source: PubMed Central journal article supplement — Proc Natl Acad Sci U S A. 2020 Jan 21;117(5):2579–87. doi: 10.1073/pnas.1909761117 (PMC7007521; doi:10.1073/pnas.1909761117), 2020-01-21
Supplement: pnas.1909761117.sapp.pdf [file pnas.1909761117.sapp.pdf]

# PNAS

[www.pnas.org](http://www.pnas.org)

Supplementary Information for

Chronic Dicer1 deficiency promotes atrophic and neovascular outer retinal pathologies in mice

Charles B. Wright, Hironori Uehara, Younghee Kim, Tetsuhiro Yasuma, Reo Yasuma, Shuichiro Hirahara, Ryan D. Makin, Ivana Apicella, Felipe Pereira, Yosuke Nagasaka, Siddharth Narendran, Shinichi Fukuda, Romulo Albuquerque, Benjamin J. Fowler, Ana Bastos-Carvalho, Philippe Georgel, Izuhō Hatada, Bo Chang, Nagaraj Kerur, Balamurali K. Ambati, Jayakrishna Ambati, Bradley D. Gelfand

Bradley D. Gelfand

Email: [gelfand@virginia.edu](mailto:gelfand@virginia.edu)

**This PDF file includes:**

Figures S1 to S9

Fig. S1

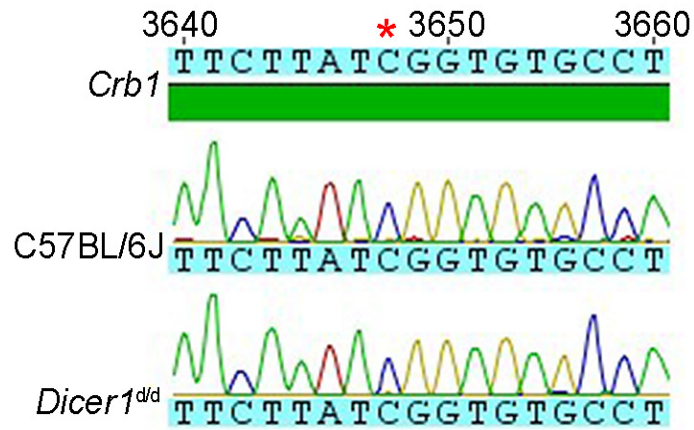

**Fig. S1.** Sequencing that of *Crb1* in *Dicer1<sup>dd</sup>* confirming the absence of rd8 mutation. rd8 arises due to a deletion of cytosine 3647 (asterisk).

Fig. S2

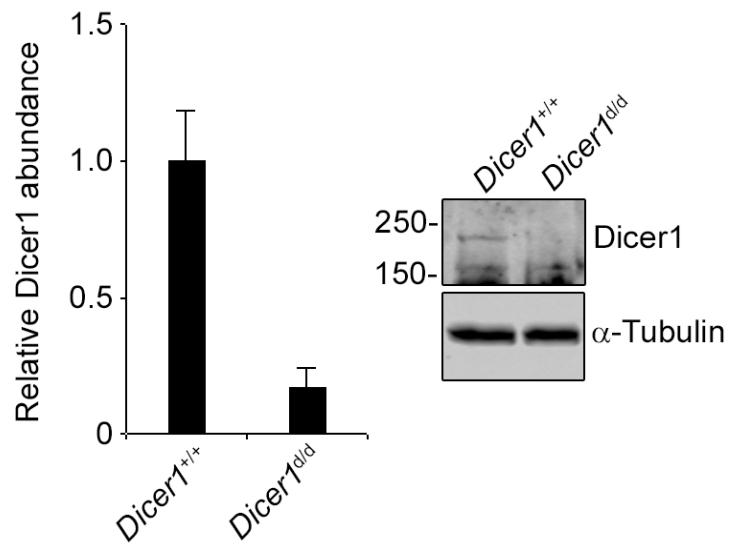

**Fig. S2.** Quantitation of Dicer1 by quantitative densitometry (left) and representative immunoblot of protein (right) from retina of littermate wild type and *Dicer1*<sup>dl/d</sup> mice.

Fig. S3

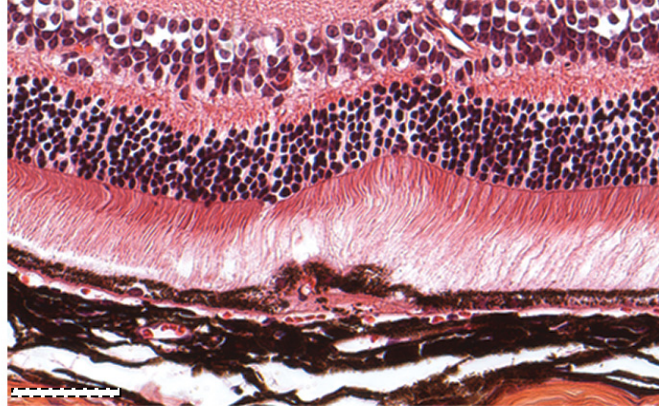

Type 1 sub-RPE lesion

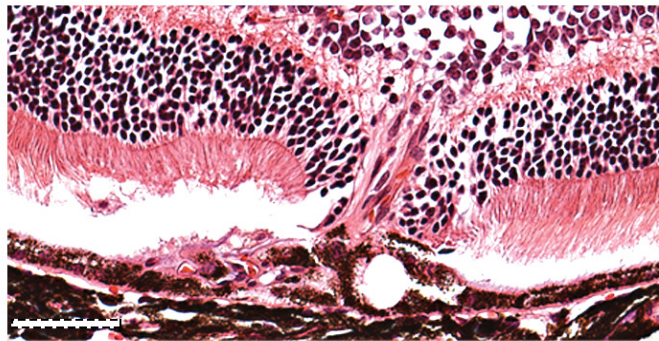

Type 3 choroidal-retinal anastomosis

**Fig. S3.** High-resolution micrographs of hematoxylin and eosin stained retina from *Dicer1<sup>d/d</sup>* mice showing sub-RPE choroidal neovascularization (top) and chorioretinal anastomosis (bottom). Scale bar = 50  $\mu$ m.

Fig. S4

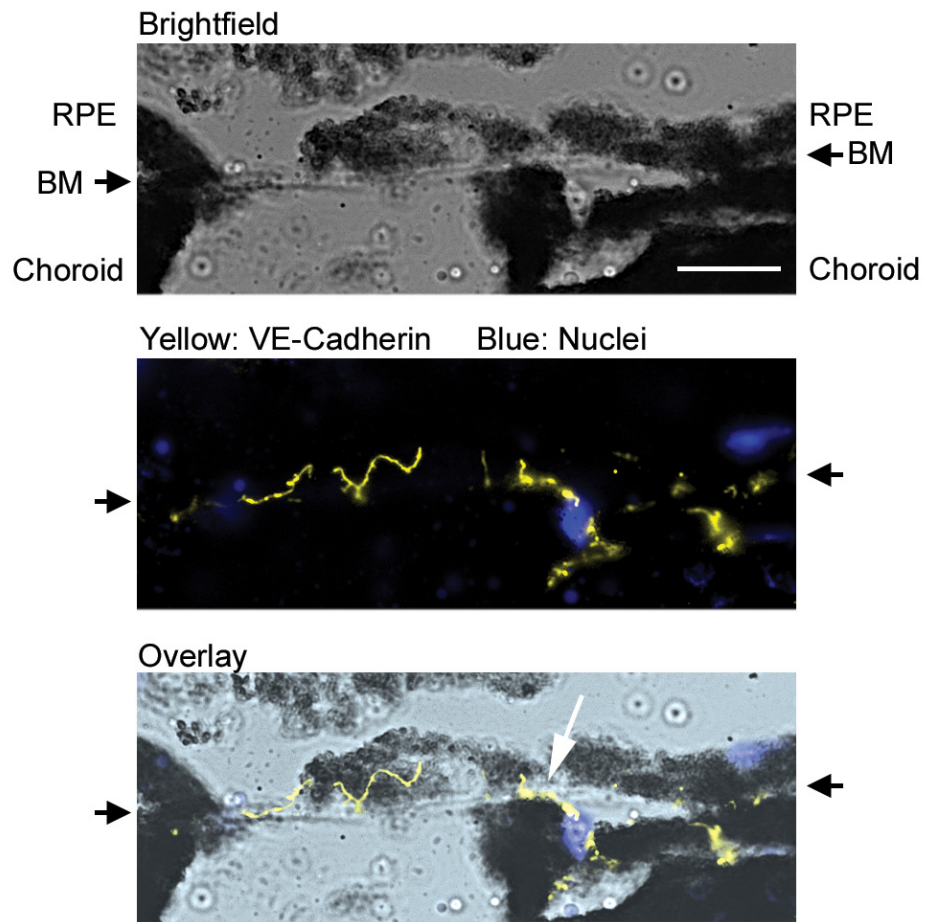

**Fig. S4.** High-resolution bright field and fluorescent micrographs of choroidal vessels traversing Bruch's membrane (BM) in *Dicer1<sup>dd</sup>* mice showing sub-RPE choroidal neovascularization (top) and chorioretinal anastomosis (bottom). White arrow denotes VE-Cadherin-positive endothelial cell crossing BM. Nuclei were labeled with DAPI.

Fig. S5

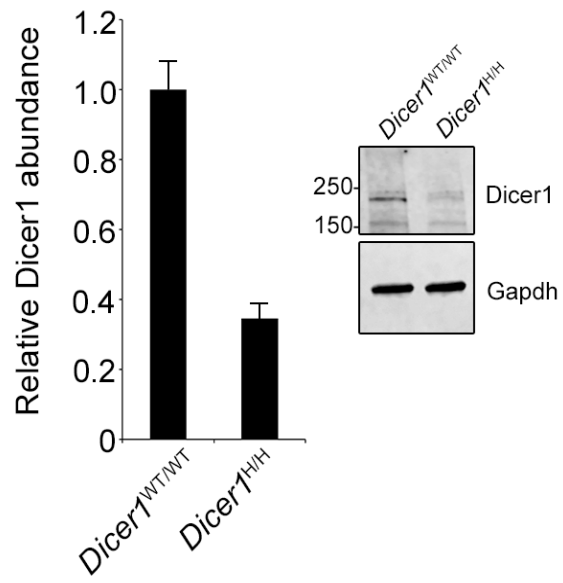

**Fig. S5.** Representative immunoblot and densitometry quantification of Dicer1 abundance in retina from *Dicer1*<sup>H/H</sup> relative to wild type littermate control mice.

Fig. S6

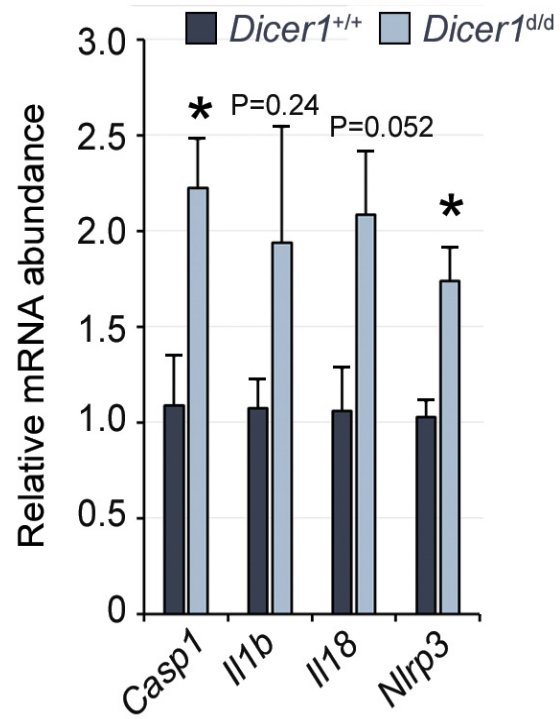

**Fig. S6.** Quantitative RT-PCR of cDNA from whole retinas of 15-month old *Dicer1*<sup>d/d</sup> and littermate control. N=3-4, \*P<0.05.

Fig. S7

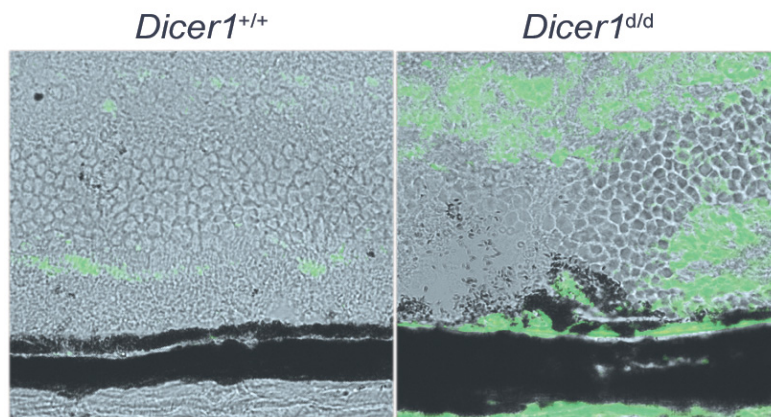

**Fig. S7.** *In situ* fluorescent labeling caspase-1 activity in unfixed retinal cryo-sections of 10-month-old wild type and *Dicer1*<sup>d/d</sup> mice. Green fluorescent signal arises from a caspase-1 peptide substrate that becomes fluorescent upon cleavage. Signal was observed in the neovascular lesions.



Fig. S8

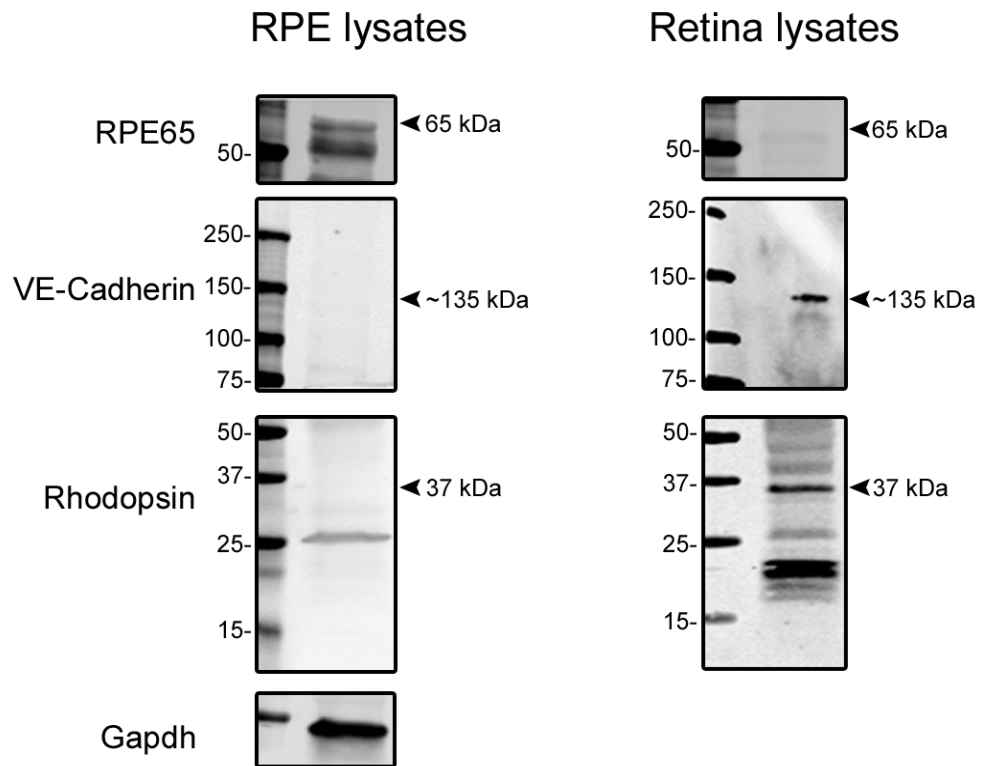

**Fig. S8.** Immunoblotting to assess purity of RPE and retina lysates. RPE lysates isolated from wild-type mice are enriched for RPE65, and lack detectable rhodopsin and VE-Cadherin compared to retinal lysates.

Fig. S9

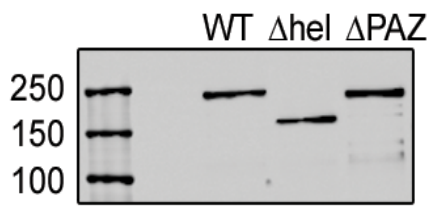

**Fig. S9.** Immunoblotting of purified DICER1 constructs expressed in HEK293T cells after transient transfection.
